# Supplementary material for: Effects of the alternative medical curriculum at the Hannover Medical School on length of study and academic success
Source: PubMed Central journal article supplement (PMC10594034; doi:10.3205/zma001646), 2023-09-15
Supplement: JME-40-64-s-001.pdf [file JME-40-64-s-001.pdf]

## Attachment 1: Supplementary material

**Figure A1:** Exceeding the length of time intended for M1\* and length of time between M1\* and M2, for students admitted via the waiting list (WQ)

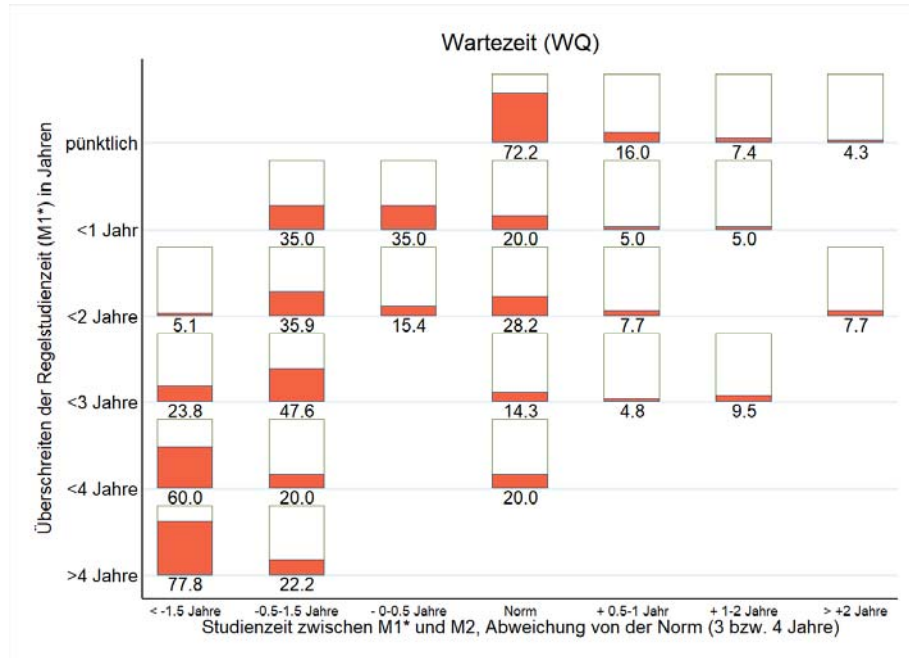

*Note:* Length of study time between M1\* and M2 (ordinate) depending on the delay in M1\*. The red bars indicate the percentage of students per category of M1\* delay. If M1\* (after two years) and M2 (generally in five years) are both completed "on time," then the length of study time from M1\* to M2 is three years. For instance, almost 80% of WQ students who completed M1\* after more than three but less than four years kept within the normal length of study time or even finished sooner.

**Figure A2:** Exceeding the length of study intended for M1\* and length of study between M1\* and M2, for students admitted based on special quotas (VQ)

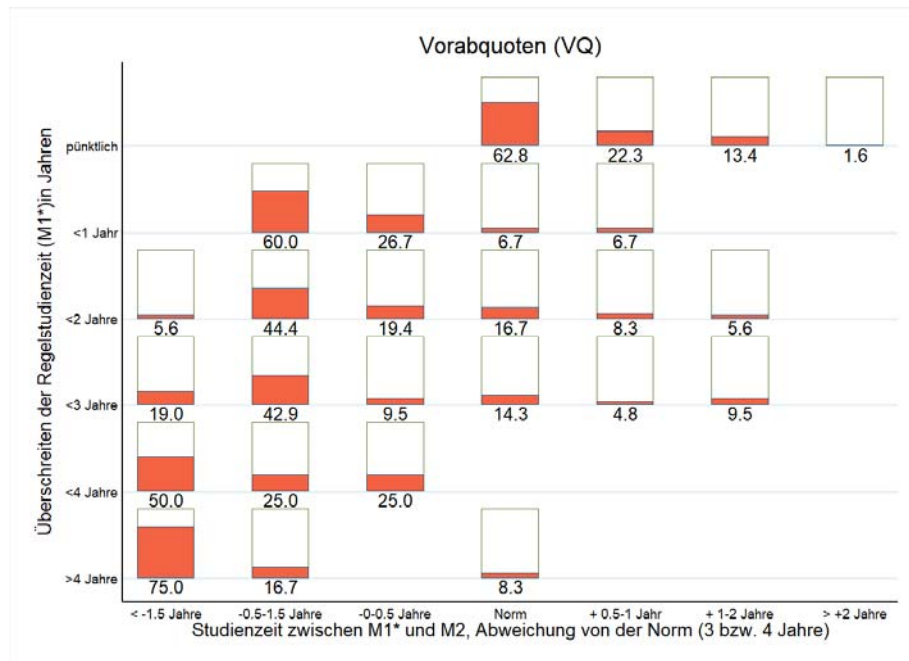

*Note:* Length of study time between M1\* and M2 (ordinate) depending on the delay in M1\*. The red bars indicate the percentage of students per category of M1\* delay. If M1\* (after two years) and M2 (generally in five years) are both completed "on time," then the length of study time from M1\* to M2 is three years.

**Table A3:** M2 grades according to length of study time for M1\* and M2

|                       | (1) M1* delayed & M2 ≤ norm | (2) M1* delayed & M2 ≥ norm | (3) M1* punctual & M2 ≥ norm |
|-----------------------|-----------------------------|-----------------------------|------------------------------|
| Best school graduates | 2.91                        | 2.86                        | 2.21                         |
|                       | (0.70)[11]                  | (0.90)[7]                   | (0.64)[281]                  |
| Waiting list          | 3.36                        | 3.26                        | 2.86                         |
|                       | (0.69)[75]                  | (0.76)[27]                  | (0.73)[299]                  |
| Selection procedure   | 2.98                        | 2.84                        | 2.59                         |
|                       | (0.67)[117]                 | (0.67)[64]                  | (0.67)[1204]                 |
| Special quotas        | 3.39                        | 3.11                        | 2.72                         |
|                       | (0.67)[79]                  | (0.88)[28]                  | (0.71)[228]                  |

*Note:* "Norm" indicates a length of study time between M1\* and passing the M2 exam of under 3.5 years. M1\* was punctually completed if the length of study time did not exceed 2.2 years. Standard deviations in parentheses; the number of observations in brackets.
